# Supplementary material
Source: Springer Nature journal article supplement (https://www.springermedizin.de/resource/supplementary/12985_2013_2551_MOESM2_ESM.pdf/9606970)

**wt-FV3**

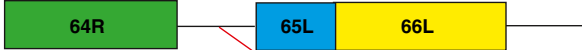

**SSME**

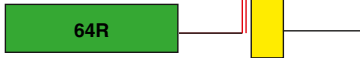

**RGV, SSTIV & TFV**

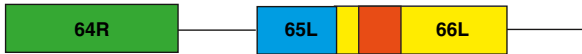

Supplement: MOESM2 [file 9606970]
